# Supplementary material for: Tissue-specific progesterone receptor-chromatin binding and the regulation of progesterone-dependent gene expression
Source: PubMed Central journal article supplement (PMC6700090; doi:10.1038/s41598-019-48333-8), 2019-08-19
Supplement: 41598_2019_48333_MOESM1_ESM.pdf [file 41598_2019_48333_MOESM1_ESM.pdf]

# **Tissue-specific progesterone receptor-chromatin binding and the regulation of progesterone-dependent gene expression**

Dinh DT <sup>1</sup>, Breen J <sup>1,2</sup>, Akison LK <sup>3</sup>, DeMayo FJ <sup>4</sup>, Brown HM <sup>1,5,6</sup>, Robker RL <sup>1</sup> & Russell DL\* <sup>1</sup>

<sup>1</sup> Robinson Research Institute, Adelaide Medical School, University of Adelaide, Australia

<sup>2</sup> University of Adelaide Bioinformatics Hub, University of Adelaide, Australia

<sup>3</sup> Child Health Research Centre, Centre for Children's Health Research, The University of Queensland, South Brisbane, Qld 4101, Australia.

<sup>4</sup> Pregnancy and Female Reproduction Group, National Institute of Environmental Health Sciences, Research Triangle Park, NC 27709.

<sup>5</sup> South Australian Health and Medical Research Institute, Adelaide, South Australia, Australia

<sup>6</sup> Australian Research Council (ARC) Centre for Nanoscale Biophotonics, University of Adelaide, Australia

**Supplementary data 1:** Input sequence for PRE motif finder with FIMO – MEME Suite.  
The letter probability matrix was obtained from HOMER motif database  
(<http://homer.ucsd.edu/homer/custom.motifs> - ID: PGR(NR)/EndoStromal-PGR-ChIP-Seq(GSE69539)/Homer) and used as input for the web-based FIMO program from MEME Suite for identification of global PRE sites in whole mouse genome.

MEME version 4

ALPHABET= ACGT

strands: + -

Background letter frequencies (from unknown source):

A 0.250 C 0.250 G 0.250 T 0.250

MOTIF 1 NRGWACANWNTGTHC

letter-probability matrix: alength= 4 w= 15 nsites= 1 E= 0e+0

0.413000 0.186000 0.190000 0.211000

0.715000 0.001000 0.244000 0.040000

0.112000 0.001000 0.886000 0.001000

0.639000 0.087000 0.117000 0.157000

0.997000 0.001000 0.001000 0.001000

0.001000 0.997000 0.001000 0.001000

0.919000 0.001000 0.001000 0.079000

0.200799 0.171828 0.225774 0.401598

0.383000 0.113000 0.109000 0.395000

0.339339 0.303303 0.146146 0.211211

0.054000 0.001000 0.001000 0.944000

0.001000 0.001000 0.997000 0.001000

0.001000 0.001000 0.001000 0.997000

0.179000 0.146000 0.066000 0.609000

0.025000 0.865000 0.001000 0.109000

**Supplementary data 2:** R script used for bioinformatics analysis of ChIP-seq data. The script is presented as an Rmarkdown file.

See Supplementary data 2

**Supplementary data 3:** Full-length Western blot of PGR in granulosa cells during ovulation (unstim or eCG + hCG 0-12 h post-hCG), from Fig 1B. Western blot was performed in biological triplicates, with 3-4 mice per time point in each replicate. White line indicates cut line for multiple immunoblotting on the same membrane. One representative example of three highly similar results is shown.

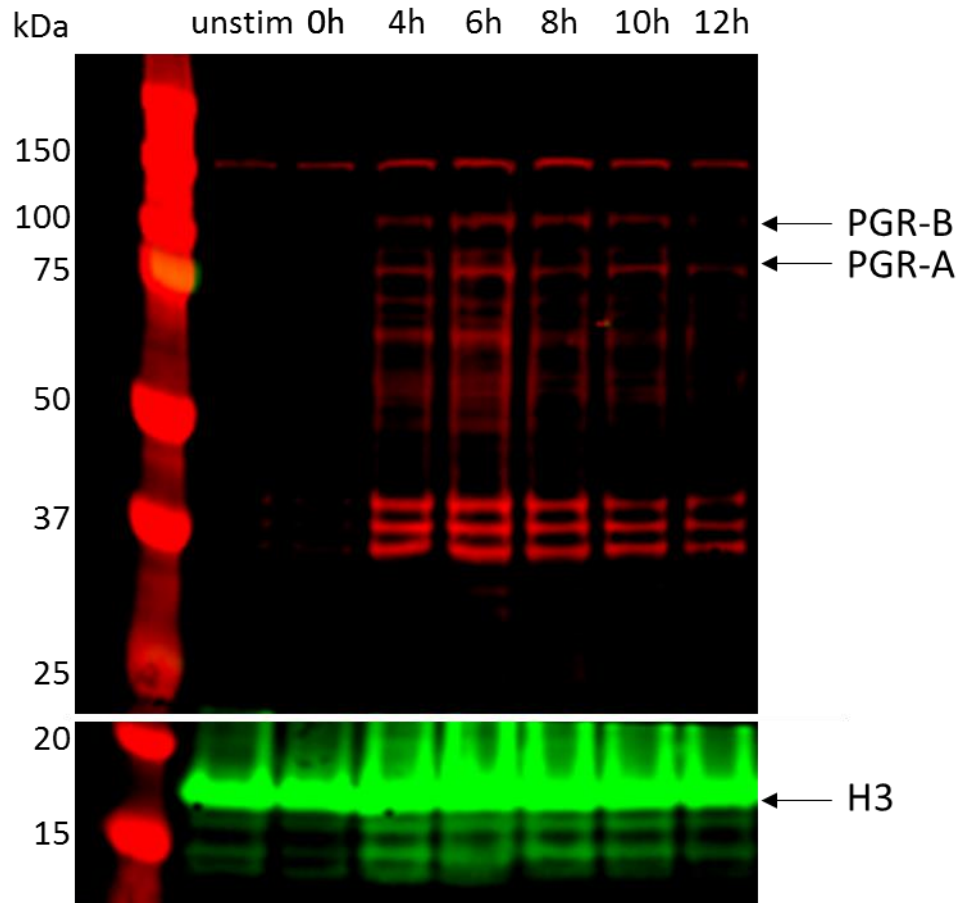

**Supplementary data 4:** (A) Binding sites for H3K27ac (green), PGR in granulosa cells (orange) and PGR in uterus (blue) in relation to absolute distance to TSS. (B) Heatmap indicating the general distribution of binding sites of H3K27ac (green), PGR in granulosa cells (orange) and in the uterus (blue) within 3 kb to the TSS.

**A**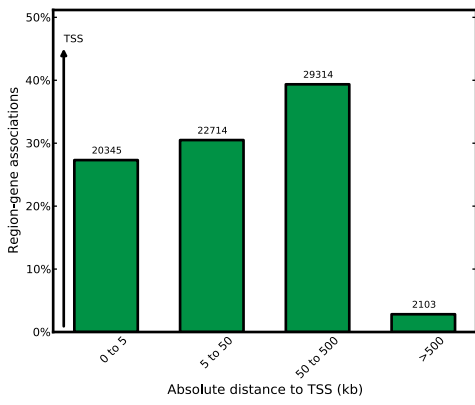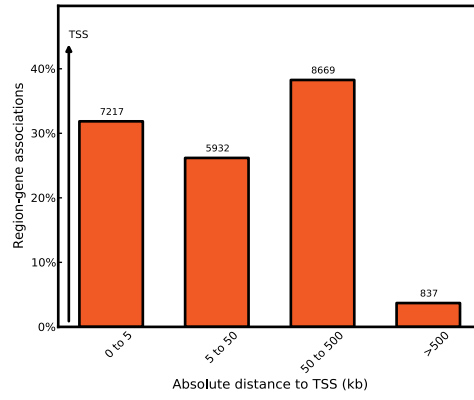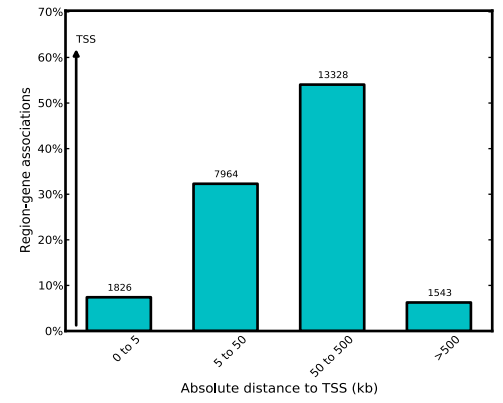**B**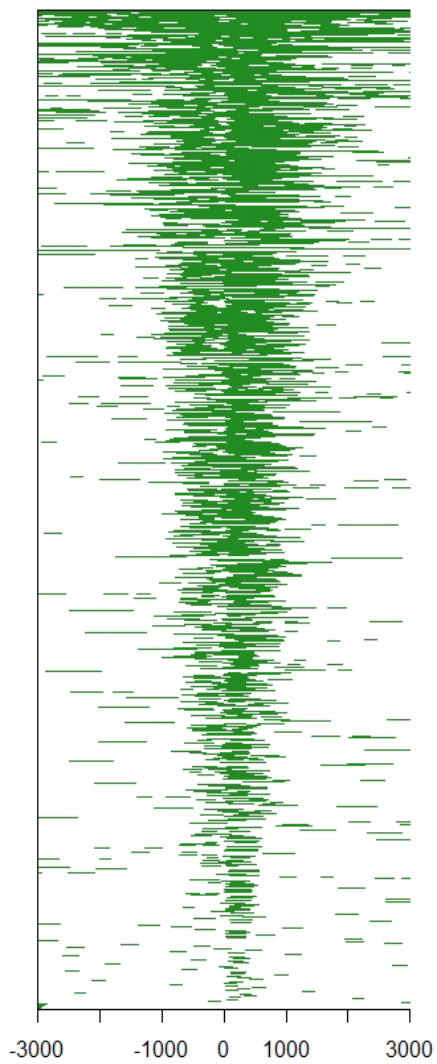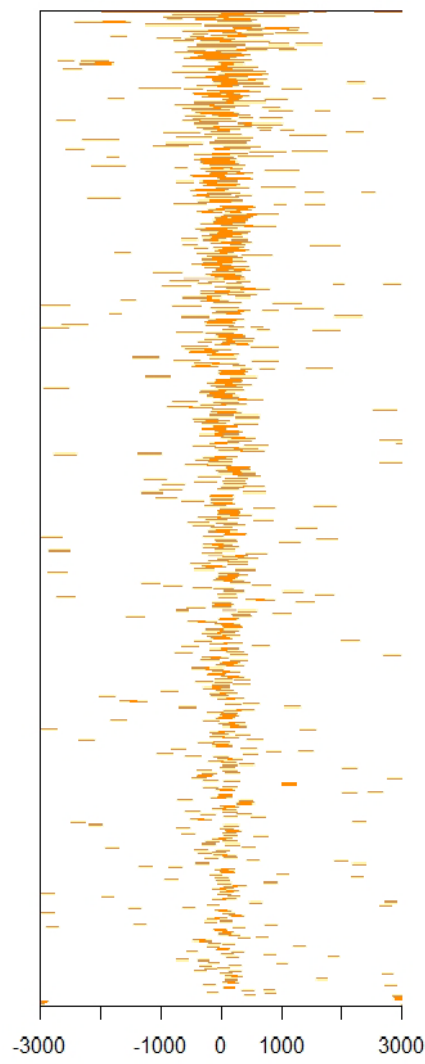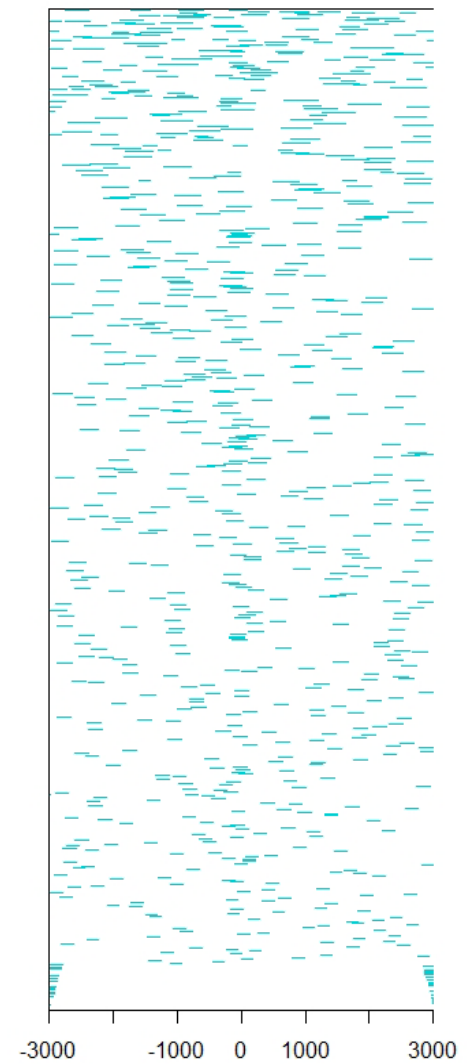

**Supplementary data 5:** Top ten most enriched pathways of binding sites for H3K27ac (green), PGR in granulosa cells (orange) and in the uterus (blue). Bars indicate fold enrichment of pathways. Circles indicate  $-\log(\text{FDR})$  value. Analysis was performed using GREAT analysis for enrichment over the mm10 genome background.

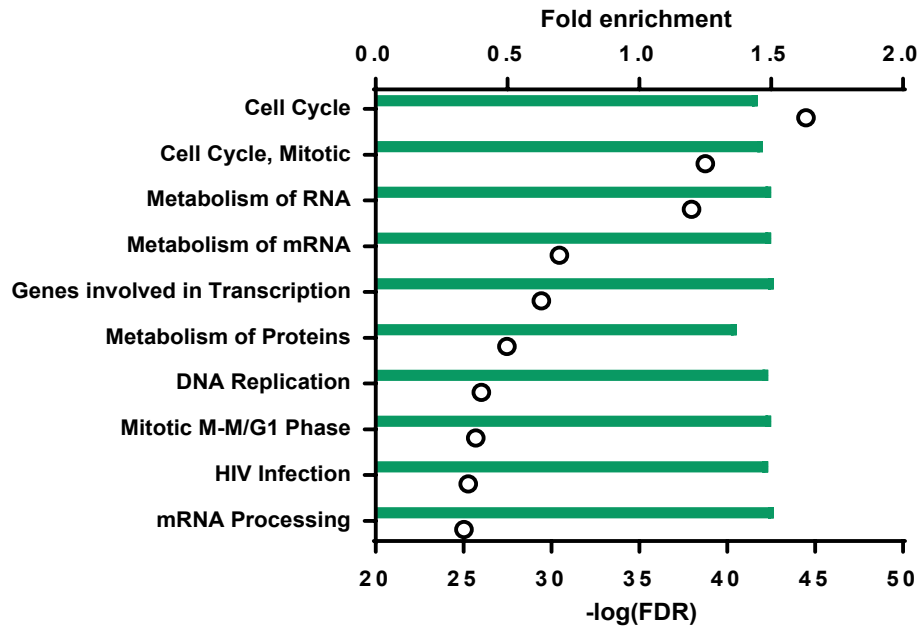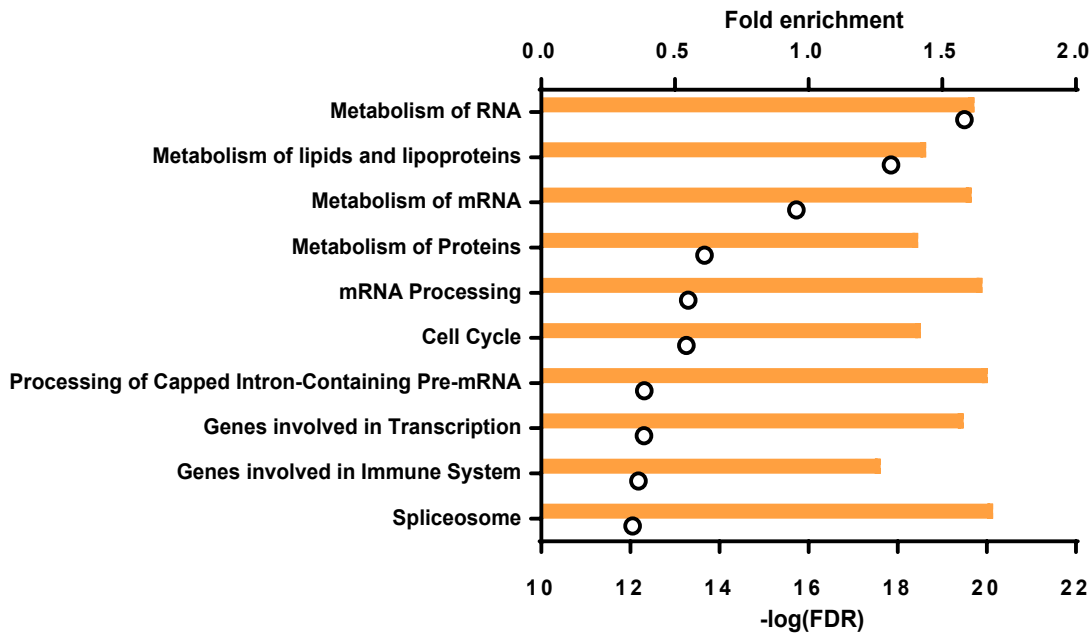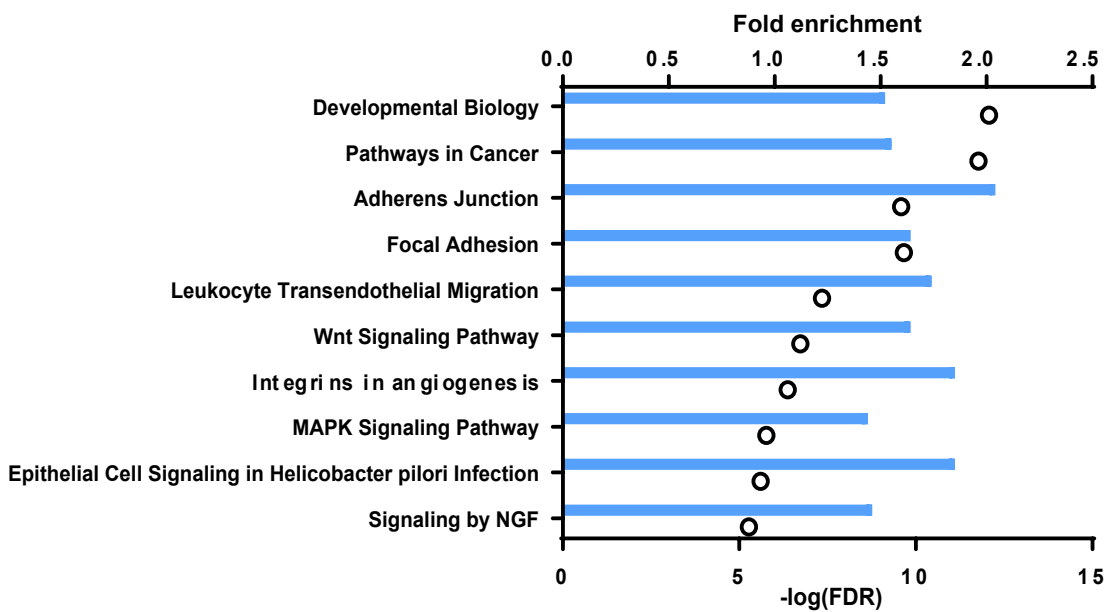



**Supplementary data 6:** GO analysis of genes with H3K27ac, PGR binding sites in granulosa cells and in the uterus. Genes were annotated for ChIP-seq binding sites and subjected to GO analysis using the *limma* Bioconductor package in R with mm10 terminology and a FDR = 0.05 cut-off. The ten most significantly enriched GO terms from each GO category were selected as representation.

|                               | Dataset                  | GO ID                                        | Term       | Total genes in pathway | Gene matching term in dataset | p-value   |
|-------------------------------|--------------------------|----------------------------------------------|------------|------------------------|-------------------------------|-----------|
| Biological Process            | Granulosa cell - H3K27ac | nitrogen compound metabolic process          | GO:0006807 | 8771                   | 5750                          | 0         |
|                               |                          | metabolic process                            | GO:0008152 | 10337                  | 6582                          | 0         |
|                               |                          | cellular process                             | GO:0009987 | 15608                  | 8601                          | 0         |
|                               |                          | macromolecule metabolic process              | GO:0043170 | 8357                   | 5367                          | 0         |
|                               |                          | cellular metabolic process                   | GO:0044237 | 9199                   | 6165                          | 0         |
|                               |                          | primary metabolic process                    | GO:0044238 | 9296                   | 6026                          | 0         |
|                               |                          | cellular macromolecule metabolic process     | GO:0044260 | 6974                   | 4716                          | 0         |
|                               |                          | organic substance metabolic process          | GO:0071704 | 9839                   | 6253                          | 0         |
|                               |                          | cellular aromatic compound metabolic process | GO:0006725 | 4913                   | 3456                          | 0         |
|                               |                          | cellular nitrogen compound metabolic process | GO:0034641 | 5435                   | 3837                          | 0         |
|                               | Granulosa cell - PGR     | cellular metabolic process                   | GO:0044237 | 9199                   | 4106                          | 0         |
|                               |                          | metabolic process                            | GO:0008152 | 10337                  | 4384                          | 6.65E-302 |
|                               |                          | primary metabolic process                    | GO:0044238 | 9296                   | 4021                          | 2.68E-284 |
|                               |                          | organic substance metabolic process          | GO:0071704 | 9839                   | 4186                          | 6.28E-282 |
|                               |                          | nitrogen compound metabolic process          | GO:0006807 | 8771                   | 3820                          | 2.33E-269 |
|                               |                          | cellular process                             | GO:0009987 | 15608                  | 5729                          | 3.66E-235 |
|                               |                          | cellular macromolecule metabolic process     | GO:0044260 | 6974                   | 3140                          | 2.78E-231 |
|                               |                          | macromolecule metabolic process              | GO:0043170 | 8357                   | 3572                          | 2.81E-221 |
|                               |                          | cellular nitrogen compound metabolic process | GO:0034641 | 5435                   | 2565                          | 1.05E-212 |
|                               | Uterus - PGR             | localization                                 | GO:0051179 | 5794                   | 1671                          | 8.68E-106 |
|                               |                          | cellular process                             | GO:0009987 | 15608                  | 3537                          | 6.60E-105 |
|                               |                          | cellular metabolic process                   | GO:0044237 | 9199                   | 2330                          | 1.59E-92  |
|                               |                          | metabolic process                            | GO:0008152 | 10337                  | 2537                          | 1.46E-88  |
|                               |                          | developmental process                        | GO:0032502 | 6097                   | 1676                          | 2.74E-86  |
|                               |                          | anatomical structure development             | GO:0048856 | 5712                   | 1591                          | 1.97E-85  |
|                               |                          | primary metabolic process                    | GO:0044238 | 9296                   | 2320                          | 3.55E-84  |
|                               |                          | organic substance metabolic process          | GO:0071704 | 9839                   | 2422                          | 3.75E-83  |
|                               |                          | system development                           | GO:0048731 | 4638                   | 1348                          | 9.23E-83  |
|                               |                          | multicellular organism development           | GO:0007275 | 5227                   | 1474                          | 1.19E-81  |
|                               | Molecular Function       | Granulosa cell - H3K27ac                     | binding    | GO:0005488             | 13121                         | 7816      |
| protein binding               |                          |                                              | GO:0005515 | 8965                   | 5596                          | 0         |
| heterocyclic compound binding |                          |                                              | GO:1901363 | 4989                   | 3481                          | 0         |
| ion binding                   |                          |                                              | GO:0043167 | 5386                   | 3576                          | 3.72E-264 |
| enzyme binding                |                          |                                              | GO:0019899 | 2282                   | 1726                          | 1.44E-205 |
| nucleic acid binding          |                          |                                              | GO:0003676 | 3093                   | 2172                          | 1.16E-191 |
| nucleotide binding            |                          |                                              | GO:0000166 | 2003                   | 1504                          | 7.91E-172 |
| nucleoside phosphate binding  |                          |                                              | GO:1901265 | 2003                   | 1504                          | 7.91E-172 |
| transferase activity          |                          |                                              | GO:0016740 | 2256                   | 1644                          | 2.08E-166 |
| small molecule binding        |                          |                                              | GO:0036094 | 2381                   | 1694                          | 1.92E-154 |
| Granulosa cell - PGR          |                          | binding                                      | GO:0005488 | 13121                  | 5170                          | 1.76E-287 |
|                               |                          | protein binding                              | GO:0005515 | 8965                   | 3732                          | 9.34E-208 |
|                               |                          | heterocyclic compound binding                | GO:1901363 | 4989                   | 2317                          | 7.71E-175 |
|                               |                          | organic cyclic compound binding              | GO:0097159 | 5086                   | 2346                          | 1.07E-172 |
|                               |                          | catalytic activity                           | GO:0003824 | 5747                   | 2563                          | 1.68E-167 |

|                      |                                          |                                          |            |       |           |           |
|----------------------|------------------------------------------|------------------------------------------|------------|-------|-----------|-----------|
|                      |                                          | ion binding                              | GO:0043167 | 5386  | 2379      | 2.16E-145 |
|                      |                                          | nucleic acid binding                     | GO:0003676 | 3093  | 1451      | 5.35E-104 |
|                      |                                          | enzyme binding                           | GO:0019899 | 2282  | 1145      | 2.69E-103 |
|                      |                                          | metal ion binding                        | GO:0046872 | 3445  | 1520      | 6.86E-84  |
|                      |                                          | cation binding                           | GO:0043169 | 3542  | 1551      | 7.68E-83  |
|                      | Uterus - PGR                             | binding                                  | GO:0005488 | 13121 | 3182      | 1.64E-130 |
|                      |                                          | protein binding                          | GO:0005515 | 8965  | 2355      | 9.67E-115 |
|                      |                                          | ion binding                              | GO:0043167 | 5386  | 1505      | 1.41E-80  |
|                      |                                          | catalytic activity                       | GO:0003824 | 5747  | 1505      | 7.07E-59  |
|                      |                                          | cation binding                           | GO:0043169 | 3542  | 992       | 4.36E-49  |
|                      |                                          | enzyme binding                           | GO:0019899 | 2282  | 703       | 5.95E-49  |
| Cellular Component   | Granulosa cell - H3K27ac                 | intracellular                            | GO:0005622 | 13641 | 9072      | 0         |
|                      |                                          | cell                                     | GO:0005623 | 16002 | 9608      | 0         |
|                      |                                          | cytoplasm                                | GO:0005737 | 10813 | 7286      | 0         |
|                      |                                          | intracellular part                       | GO:0044424 | 13571 | 9034      | 0         |
|                      |                                          | cytoplasmic part                         | GO:0044444 | 8210  | 5702      | 0         |
|                      |                                          | cell part                                | GO:0044464 | 15998 | 9607      | 0         |
|                      |                                          | organelle                                | GO:0043226 | 12153 | 8240      | 0         |
|                      |                                          | membrane-bounded organelle               | GO:0043227 | 10873 | 7550      | 0         |
|                      |                                          | intracellular organelle                  | GO:0043229 | 11843 | 8126      | 0         |
|                      |                                          | intracellular membrane-bounded organelle | GO:0043231 | 10153 | 7215      | 0         |
| Granulosa cell - PGR | intracellular                            | GO:0005622                               | 13641      | 5939  | 0         |           |
|                      | cell                                     | GO:0005623                               | 16002      | 6315  | 0         |           |
|                      | cytoplasm                                | GO:0005737                               | 10813      | 4800  | 0         |           |
|                      | intracellular part                       | GO:0044424                               | 13571      | 5915  | 0         |           |
|                      | cytoplasmic part                         | GO:0044444                               | 8210       | 3765  | 0         |           |
|                      | cell part                                | GO:0044464                               | 15998      | 6314  | 0         |           |
|                      | organelle                                | GO:0043226                               | 12153      | 5395  | 0         |           |
|                      | membrane-bounded organelle               | GO:0043227                               | 10873      | 4956  | 0         |           |
|                      | intracellular organelle                  | GO:0043229                               | 11843      | 5324  | 0         |           |
|                      | intracellular membrane-bounded organelle | GO:0043231                               | 10153      | 4733  | 0         |           |
| Uterus - PGR         | cell                                     | GO:0005623                               | 16002      | 3821  | 1.16E-198 |           |
|                      | cell part                                | GO:0044464                               | 15998      | 3820  | 1.82E-198 |           |
|                      | intracellular                            | GO:0005622                               | 13641      | 3402  | 3.79E-182 |           |
|                      | intracellular part                       | GO:0044424                               | 13571      | 3385  | 5.87E-180 |           |
|                      | cytoplasm                                | GO:0005737                               | 10813      | 2813  | 5.99E-150 |           |
|                      | organelle                                | GO:0043226                               | 12153      | 3046  | 2.52E-144 |           |
|                      | intracellular organelle                  | GO:0043229                               | 11843      | 2984  | 2.68E-142 |           |
|                      | membrane-bounded organelle               | GO:0043227                               | 10873      | 2699  | 1.28E-106 |           |
|                      | cytoplasmic part                         | GO:0044444                               | 8210       | 2165  | 3.15E-102 |           |
|                      | intracellular membrane-bounded organelle | GO:0043231                               | 10153      | 2492  | 8.43E-86  |           |

**Supplementary data 7:** HOMER output for known motif enrichment analysis of PGR binding sites in granulosa cells. Motifs are ranked by fold change to background and only motifs with a fold change  $\geq 2$  are included.

Supplementary data 7

HOMER output

Total Target Sequences = 12553, Total Background Sequences = 36232

| Motif                                                                              | Name                                                 | log P-value | # Target Sequences with Motif | % of Targets Sequences with Motif | # BG Sequences with Motif | % of BG Sequences with Motif | FC to BG |
|------------------------------------------------------------------------------------|------------------------------------------------------|-------------|-------------------------------|-----------------------------------|---------------------------|------------------------------|----------|
|    | GRE(NR),IR3/A549-GR-ChIP-Seq(GSE32465)/Homer         | -1067       | 930                           | 7.41%                             | 372.3                     | 1.03%                        | 7.19     |
|    | PGR(NR)/EndoStromal-PGR-ChIP-Seq(GSE69539)/Homer     | -1213       | 1151                          | 9.17%                             | 517.3                     | 1.43%                        | 6.41     |
|   | GRE(NR),IR3/RAW264.7-GRE-ChIP-Seq(Unpublished)/Homer | -1359       | 1319                          | 10.51%                            | 613                       | 1.69%                        | 6.22     |
|  | Jun-AP1(bZIP)/K562-cJun-ChIP-Seq(GSE31477)/Homer     | -929        | 944                           | 7.52%                             | 457.9                     | 1.26%                        | 5.97     |
|  | FosI2(bZIP)/3T3L1-FosI2-ChIP-Seq(GSE56872)/Homer     | -1045       | 1201                          | 9.57%                             | 672                       | 1.86%                        | 5.15     |
|  | ARE(NR)/LNCAP-AR-ChIP-Seq(GSE27824)/Homer            | -1073       | 1261                          | 10.04%                            | 724.2                     | 2.00%                        | 5.02     |
|  | Nrf2(bZIP)/Lymphoblast-Nrf2-ChIP-Seq(GSE37589)/Homer | -111        | 139                           | 1.11%                             | 84.2                      | 0.23%                        | 4.83     |

|                                                                                    |                                                         |       |      |        |        |       |      |
|------------------------------------------------------------------------------------|---------------------------------------------------------|-------|------|--------|--------|-------|------|
|    | Fra2(bZIP)/Striatum-Fra2-ChIP-Seq(GSE43429)/Homer       | -1233 | 1526 | 12.16% | 931.8  | 2.57% | 4.73 |
|    | Bach2(bZIP)/OCILy7-Bach2-ChIP-Seq(GSE44420)/Homer       | -466  | 604  | 4.81%  | 376.9  | 1.04% | 4.63 |
|    | Fra1(bZIP)/BT549-Fra1-ChIP-Seq(GSE46166)/Homer          | -1350 | 1703 | 13.57% | 1065.3 | 2.94% | 4.62 |
|    | Bach1(bZIP)/K562-Bach1-ChIP-Seq(GSE31477)/Homer         | -117  | 151  | 1.20%  | 94.1   | 0.26% | 4.62 |
|   | JunB(bZIP)/DendriticCells-Junb-ChIP-Seq(GSE36099)/Homer | -1283 | 1682 | 13.40% | 1091.4 | 3.01% | 4.45 |
|  | Atf3(bZIP)/GBM-ATF3-ChIP-Seq(GSE33912)/Homer            | -1377 | 1893 | 15.08% | 1293.5 | 3.57% | 4.22 |
|  | BATF(bZIP)/Th17-BATF-ChIP-Seq(GSE39756)/Homer           | -1338 | 1854 | 14.77% | 1274.5 | 3.52% | 4.20 |
|  | NF-E2(bZIP)/K562-NFE2-ChIP-Seq(GSE31477)/Homer          | -111  | 161  | 1.28%  | 112.4  | 0.31% | 4.13 |
|  | AP-1(bZIP)/ThioMacPU.1-ChIP-Seq(GSE21512)/Homer         | -1254 | 1978 | 15.76% | 1528.5 | 4.22% | 3.73 |

|                                                                                    |                                                   |      |      |        |        |       |      |
|------------------------------------------------------------------------------------|---------------------------------------------------|------|------|--------|--------|-------|------|
|    | Gata1(Zf)/K562-GATA1-ChIP-Seq(GSE18829)/Homer     | -595 | 1236 | 9.85%  | 1150.7 | 3.18% | 3.10 |
|    | SF1(NR)/H295R-Nr5a1-ChIP-Seq(GSE44220)/Homer      | -713 | 1488 | 11.85% | 1399   | 3.86% | 3.07 |
|    | CEBP(bZIP)/ThioMac-CEBPb-ChIP-Seq(GSE21512)/Homer | -631 | 1326 | 10.56% | 1247.7 | 3.44% | 3.07 |
|    | Chop(bZIP)/MEF-Chop-ChIP-Seq(GSE35681)/Homer      | -182 | 401  | 3.19%  | 382.7  | 1.06% | 3.01 |
|   | Nr5a2(NR)/mES-Nr5a2-ChIP-Seq(GSE19019)/Homer      | -800 | 1709 | 13.61% | 1641.6 | 4.53% | 3.00 |
|  | Atf4(bZIP)/MEF-Atf4-ChIP-Seq(GSE35681)/Homer      | -251 | 558  | 4.44%  | 536.6  | 1.48% | 3.00 |
|  | Gata2(Zf)/K562-GATA2-ChIP-Seq(GSE18829)/Homer     | -602 | 1318 | 10.50% | 1274.6 | 3.52% | 2.98 |
|  | RUNX(Runt)/HPC7-Runx1-ChIP-Seq(GSE22178)/Homer    | -854 | 1988 | 15.84% | 2035.2 | 5.62% | 2.82 |
|  | Gata6(Zf)/HUG1N-GATA6-ChIP-Seq(GSE51936)/Homer    | -653 | 1639 | 13.06% | 1740.4 | 4.80% | 2.72 |
|  | Nr5a2(NR)/Pancreas-LRH1-ChIP-Seq(GSE34295)/Homer  | -795 | 2041 | 16.26% | 2220.4 | 6.13% | 2.65 |

|                                                                                    |                                                          |      |      |        |        |       |      |
|------------------------------------------------------------------------------------|----------------------------------------------------------|------|------|--------|--------|-------|------|
|    | RUNX-AML(Runt)/CD4+ PolIII-ChIP-Seq(Barski_et_al.)/Homer | -666 | 1776 | 14.15% | 1962.4 | 5.42% | 2.61 |
|    | RUNX2(Runt)/PCa-RUNX2-ChIP-Seq(GSE33889)/Homer           | -722 | 1970 | 15.69% | 2216   | 6.12% | 2.56 |
|    | HLF(bZIP)/HSC-HLF.Flag-ChIP-Seq(GSE69817)/Homer          | -463 | 1315 | 10.47% | 1488.1 | 4.11% | 2.55 |
|    | Gata4(Zf)/Heart-Gata4-ChIP-Seq(GSE35151)/Homer           | -621 | 1744 | 13.89% | 1982.2 | 5.47% | 2.54 |
|  | RUNX1(Runt)/Jurkat-RUNX1-ChIP-Seq(GSE29180)/Homer        | -839 | 2361 | 18.81% | 2729.7 | 7.54% | 2.49 |
|  | MafK(bZIP)/C2C12-MafK-ChIP-Seq(GSE36030)/Homer           | -120 | 426  | 3.39%  | 535.8  | 1.48% | 2.29 |
|  | RARg(NR)/ES-RARg-ChIP-Seq(GSE30538)/Homer                | -21  | 73   | 0.58%  | 95.8   | 0.26% | 2.23 |
|  | GATA3(Zf)/iTreg-Gata3-ChIP-Seq(GSE20898)/Homer           | -600 | 2244 | 17.87% | 2980.9 | 8.23% | 2.17 |
|  | Esrrb(NR)/mES-Esrrb-ChIP-Seq(GSE11431)/Homer             | -369 | 1438 | 11.45% | 1911.8 | 5.28% | 2.17 |



|                                                                                  |                                                                       |      |      |       |        |       |      |
|----------------------------------------------------------------------------------|-----------------------------------------------------------------------|------|------|-------|--------|-------|------|
|  | CEBP:AP1(bZIP)/T<br>hioMac-CEBPb-<br>ChIP-<br>Seq(GSE21512)/H<br>omer | -270 | 1135 | 9.04% | 1550.6 | 4.28% | 2.11 |
|  | GFX(?)/Promoter/<br>Homer                                             | -22  | 89   | 0.71% | 122.7  | 0.34% | 2.09 |
|  | JunD(bZIP)/K562-<br>JunD-ChIP-<br>Seq/Homer                           | -59  | 264  | 2.10% | 370    | 1.02% | 2.06 |
|  | GATA3(Zf),DR4/iTr<br>eg-Gata3-ChIP-<br>Seq(GSE20898)/H<br>omer        | -17  | 71   | 0.57% | 101.9  | 0.28% | 2.04 |

**Supplementary data 8:** GO analysis of PGR-dependent genes in granulosa cells. Genes were identified from microarrays performed on PRKO vs PGR+/- granulosa cells (5 biological replicates each) and subjected to GO analysis using the *limma* Bioconductor package in R with mm10 terminology and a FDR = 0.05 cut-off. The ten most significantly enriched GO terms from each GO category were selected as representation.

|                    | GO ID      | Term                                     | Total gene in pathway | Gene in DEG | p-value   |
|--------------------|------------|------------------------------------------|-----------------------|-------------|-----------|
| Biological Process | GO:0008152 | Metabolic process                        | 10301                 | 9290        | 0         |
|                    | GO:0009987 | Cellular process                         | 15212                 | 13586       | 0         |
|                    | GO:0044237 | Cellular metabolic process               | 9150                  | 8434        | 0         |
|                    | GO:0044238 | Primary metabolic process                | 9301                  | 8465        | 0         |
|                    | GO:0044260 | Cellular macromolecule metabolic process | 7374                  | 6781        | 0         |
|                    | GO:0044699 | Single-organism process                  | 13406                 | 12077       | 0         |
|                    | GO:0050789 | Regulation of biological process         | 11067                 | 10008       | 0         |
|                    | GO:0050794 | Regulation of cellular process           | 10457                 | 9482        | 0         |
|                    | GO:0065007 | Biological regulation                    | 11579                 | 10477       | 0         |
|                    | GO:0071704 | Organic substance metabolic process      | 9785                  | 8815        | 0         |
| Molecular Function | GO:0005488 | Binding                                  | 12634                 | 11636       | 0         |
|                    | GO:0005515 | Protein binding                          | 8341                  | 7690        | 0         |
|                    | GO:0043167 | Ion binding                              | 5243                  | 5015        | 0         |
|                    | GO:1901363 | Heterocyclic compound binding            | 5189                  | 4845        | 1.98E-285 |
|                    | GO:0097159 | Organic cyclic compound binding          | 5284                  | 4923        | 8.98E-284 |
|                    | GO:0043169 | Cation binding                           | 3460                  | 3310        | 1.37E-242 |
|                    | GO:0046872 | Metal ion binding                        | 3363                  | 3219        | 1.07E-236 |
|                    | GO:0043168 | Anion binding                            | 2538                  | 2436        | 2.74E-180 |
|                    | GO:0003674 | Molecular function                       | 22842                 | 17855       | 3.34E-157 |
|                    | GO:0036094 | Small molecule binding                   | 2285                  | 2187        | 1.32E-155 |
| Cellular Component | GO:0005622 | Intracellular                            | 13157                 | 12066       | 0         |
|                    | GO:0005623 | Cell                                     | 15313                 | 13931       | 0         |
|                    | GO:0005737 | Cytoplasm                                | 10208                 | 9534        | 0         |
|                    | GO:0044424 | Intracellular part                       | 13050                 | 11970       | 0         |
|                    | GO:0044444 | Cytoplasmic part                         | 7645                  | 7138        | 0         |
|                    | GO:0044464 | Cell part                                | 15305                 | 13928       | 0         |
|                    | GO:0016020 | Membrane                                 | 9433                  | 8693        | 0         |
|                    | GO:0016021 | Integral component of membrane           | 5696                  | 5329        | 0         |
|                    | GO:0031224 | Intrinsic component of membrane          | 5847                  | 5469        | 0         |
|                    | GO:0043226 | Organelle                                | 12350                 | 11423       | 0         |

**Supplementary data 9:** List of genes determined to be significantly differentially expressed in mouse PRKO vs PGR<sup>+/-</sup> granulosa cell, oviduct and uterus microarrays.

**Supplementary data 9: List of genes determined to be significantly differentially expressed in mouse PRKO vs PGR+/- granulosa cell, oviduct and uterus microarrays.**

DEG from PRKO vs PGR+/- mouse granulosa cells

| Probeset ID | Gene Symbol   | RefSeq       | p-value | Fold-Change(KO vs. +/-) |
|-------------|---------------|--------------|---------|-------------------------|
| 10593225    | Zbtb16        | NM_001033324 | 0.00032 | -13.7345                |
| 10498024    | Slc7a11       | NM_011990    | 0.00009 | -7.5591                 |
| 10531919    | Hsd17b11      | NM_053262    | 0.00009 | -6.5212                 |
| 10380285    | Tmem100       | NM_026433    | 0.00277 | -5.3345                 |
| 10573626    | Gpt2          | NM_173866    | 0.00010 | -4.7675                 |
| 10381474    | Arl4d         | NM_025404    | 0.00254 | -4.3798                 |
| 10493873    | Sprr2g        | NR_003548    | 0.00059 | -4.0126                 |
| 10454198    | Rnf125        | NM_026301    | 0.00173 | -3.7550                 |
| 10576911    | Efnb2         | NM_010111    | 0.00049 | -3.7175                 |
| 10588263    | Slco2a1       | NM_033314    | 0.00991 | -3.6604                 |
| 10573979    | Gnao1         | NM_010308    | 0.00282 | -3.6084                 |
| 10377215    | Gas7          | NM_008088    | 0.00083 | -3.5699                 |
| 10354168    | Tbc1d8        | NM_018775    | 0.00035 | -3.5541                 |
| 10500021    | Cgn           | NM_001037711 | 0.00136 | -3.5274                 |
| 10568873    | Adam8         | NM_007403    | 0.00010 | -3.4781                 |
| 10357472    | Cxcr4         | NM_009911    | 0.00032 | -3.4756                 |
| 10494043    | Tdrkh         | NM_028307    | 0.00049 | -3.4170                 |
| 10476512    | Snap25        | NM_011428    | 0.00009 | -3.2078                 |
| 10463070    | Entpd1        | NM_009848    | 0.00008 | -3.1707                 |
| 10506301    | Lepr          | NM_001122899 | 0.00915 | -3.0562                 |
| 10498076    | Maml3         | NM_001004176 | 0.00282 | -3.0398                 |
| 10438769    | Cldn1         | NM_016674    | 0.00173 | -3.0150                 |
| 10527870    | Kl            | NM_013823    | 0.00097 | -2.8830                 |
| 10350753    | Glul          | NM_008131    | 0.00025 | -2.8799                 |
| 10574023    | Mt2           | NM_008630    | 0.00604 | -2.8766                 |
| 10523674    | Nudt9         | NM_028794    | 0.00616 | -2.8589                 |
| 10457323    | Mkx           | NM_177595    | 0.00173 | -2.8130                 |
| 10382802    | Sphk1         | NM_011451    | 0.00019 | -2.7980                 |
| 10488322    | A230067G21Rik | NM_001033348 | 0.00144 | -2.7570                 |
| 10554269    | Abhd2         | NM_018811    | 0.00049 | -2.7182                 |
| 10374453    | Glul          | BC015086     | 0.00008 | -2.6955                 |
| 10606989    | Tsc22d3       | NM_001077364 | 0.00064 | -2.6920                 |
| 10352905    | Cd34          | NM_001111059 | 0.00014 | -2.6770                 |
| 10581865    | Ldhd          | NM_027570    | 0.00346 | -2.6442                 |
| 10440522    | Adamts1       | NM_009621    | 0.00193 | -2.5762                 |
| 10581455    | Rbm35b        | NM_176838    | 0.00805 | -2.5681                 |
| 10400143    | Stxbp6        | NM_144552    | 0.00113 | -2.4634                 |
| 10554693    | Stard5        | NM_023377    | 0.00126 | -2.4531                 |
| 10453629    | 9430020K01Rik | NM_001081963 | 0.00254 | -2.3975                 |
| 10409162    | Susd3         | NM_025491    | 0.00170 | -2.3737                 |
| 10589773    | Lba1          | BC086653     | 0.00997 | -2.3663                 |
| 10567043    | Rras2         | NM_025846    | 0.00010 | -2.3339                 |
| 10501229    | Gstm1         | NM_010358    | 0.00205 | -2.3326                 |
| 10603492    | Porcn         | NM_016913    | 0.00193 | -2.2888                 |
| 10506714    | Lrp8          | NM_053073    | 0.00877 | -2.2629                 |
| 10575976    | Crispld2      | NM_030209    | 0.00098 | -2.2351                 |

|          |         |              |         |         |
|----------|---------|--------------|---------|---------|
| 10361381 | Syne1   | NM_001079686 | 0.00552 | -2.1899 |
| 10520950 | Pdlim1  | NM_016861    | 0.00574 | -2.1859 |
| 10392347 | Pitpnc1 | NM_145823    | 0.00409 | -2.1853 |
| 10411958 | Rnf180  | NM_027934    | 0.00361 | -2.1572 |
| 10369604 | Vps26a  | NM_133672    | 0.00075 | -2.1556 |
| 10464836 | Actn3   | NM_013456    | 0.00115 | -2.1455 |
| 10534889 | Hrbl    | NM_178162    | 0.00409 | -2.1182 |
| 10539517 | Dysf    | NM_021469    | 0.00512 | -2.0700 |
| 10527936 | Fzd1    | NM_021457    | 0.00056 | -2.0453 |
| 10430179 | Apol7b  | NM_001024848 | 0.00161 | -2.0430 |
| 10405822 | Ccrk    | NM_053180    | 0.00026 | -2.0308 |
| 10469581 | Etl4    | NM_001081006 | 0.00891 | -2.0301 |
| 10374366 | Egfr    | NM_207655    | 0.00203 | -2.0191 |
| 10500837 | Dclre1b | NM_133865    | 0.00272 | -2.0147 |
| 10392440 | Slc16a6 | NM_001029842 | 0.00186 | -2.0131 |
| 10425040 | Apol7b  | NM_001024848 | 0.00136 | -2.0047 |
| 10448081 | Rgmb    | NM_178615    | 0.00272 | 2.1630  |

DEG from PRKO vs PGR+/- mouse oviduct

| Probeset ID | Gene Symbol | RefSeq       | p-value  | Fold-Change(KO vs. +/-) |
|-------------|-------------|--------------|----------|-------------------------|
| 10480090    | Itga8       | NM_001001309 | 1.52E-06 | -9.866                  |
| 10494643    | Hmgcs2      | NM_008256    | 3.06E-04 | -5.812                  |
| 10603746    | Maob        | NM_172778    | 3.37E-04 | -5.481                  |
| 10353252    | Gm106       | BC147195     | 1.46E-03 | -4.506                  |
| 10593225    | Zbtb16      | NM_001033324 | 5.69E-04 | -4.326                  |
| 10576235    | Dpep1       | NM_007876    | 4.73E-03 | -4.019                  |
| 10453057    | Cyp1b1      | NM_009994    | 5.85E-03 | -3.877                  |
| 10419854    | Slc7a8      | NM_016972    | 9.12E-03 | -3.765                  |
| 10358389    | Rgs2        | NM_009061    | 5.78E-04 | -3.644                  |
| 10520633    | Tcf23       | NM_053085    | 9.41E-04 | -3.564                  |
| 10347583    | Des         | NM_010043    | 3.37E-04 | -3.548                  |
| 10381474    | Arl4d       | NM_025404    | 1.79E-03 | -3.52                   |
| 10479165    | Edn3        | NM_007903    | 1.15E-03 | -3.431                  |
| 10423049    | Prlr        | BC096586     | 1.61E-03 | -3.388                  |
| 10483439    | Lrp2        | NM_001081088 | 6.02E-04 | -3.316                  |
| 10440522    | Adamts1     | NM_009621    | 7.65E-04 | -3.18                   |
| 10549102    | Kcnj8       | NM_008428    | 5.72E-04 | -3.149                  |
| 10599348    | Gria3       | NM_016886    | 3.32E-03 | -3.145                  |
| 10568536    | Cpxm2       | NM_018867    | 4.92E-04 | -3.117                  |
| 10506488    | Ppap2b      | NM_080555    | 4.47E-04 | -2.895                  |
| 10492021    | Postn       | NM_015784    | 1.04E-03 | -2.865                  |
| 10547206    | Fxyd4       | NM_033648    | 5.46E-04 | -2.85                   |
| 10510574    | Errfi1      | NM_133753    | 4.47E-04 | -2.779                  |
| 10568001    | Sult1a1     | NM_133670    | 4.47E-04 | -2.708                  |
| 10448836    | Tmem204     | NM_001001183 | 4.65E-03 | -2.707                  |
| 10449452    | Fkbp5       | NM_010220    | 4.53E-03 | -2.683                  |
| 10595211    | Col12a1     | NM_007730    | 9.92E-04 | -2.667                  |
| 10392522    | Abca8a      | NM_153145    | 7.29E-03 | -2.66                   |
| 10495449    | Col11a1     | NM_007729    | 6.27E-05 | -2.642                  |
| 10511363    | Penk1       | NM_001002927 | 5.72E-04 | -2.64                   |
| 10603099    | Figf        | NM_010216    | 2.04E-03 | -2.629                  |

|          |          |                |          |        |
|----------|----------|----------------|----------|--------|
| 10572928 | Rasd2    | ENSMUST0000004 | 4.93E-03 | -2.533 |
| 10545707 | Actg2    | NM_009610      | 6.27E-05 | -2.522 |
| 10540028 | Klf15    | NM_023184      | 9.60E-04 | -2.508 |
| 10560329 | Hif3a    | NM_016868      | 7.65E-04 | -2.505 |
| 10466712 | Mamdc2   | NM_174857      | 9.10E-04 | -2.488 |
| 10431410 | Mapk11   | NM_011161      | 7.65E-04 | -2.47  |
| 10394068 | Sectm1a  | NM_145373      | 3.12E-03 | -2.464 |
| 10571601 | Pdlim3   | NM_016798      | 1.81E-03 | -2.426 |
| 10468113 | Kcnp2    | NM_145703      | 3.22E-03 | -2.418 |
| 10489444 | Wfdc15b  | NM_138685      | 1.69E-03 | -2.396 |
| 10423654 | Osr2     | NM_054049      | 6.82E-03 | -2.38  |
| 10583179 | Pgr      | NM_008829      | 9.92E-04 | -2.374 |
| 10413813 | Galntl2  | NM_030166      | 9.41E-04 | -2.362 |
| 10495794 | Pde5a    | NM_153422      | 5.69E-04 | -2.348 |
| 10522467 | Rasl11b  | NM_026878      | 3.38E-03 | -2.338 |
| 10575917 | Wfdc1    | NM_023395      | 1.55E-03 | -2.323 |
| 10540059 | Slc41a3  | NM_027868      | 7.65E-04 | -2.31  |
| 10502805 | Ptgfr    | NM_008966      | 1.32E-02 | -2.279 |
| 10435388 | Adcy5    | NM_001012765   | 3.37E-04 | -2.272 |
| 10386996 | Myocd    | NM_145136      | 2.86E-03 | -2.267 |
| 10361828 | Cited2   | NM_010828      | 1.26E-02 | -2.258 |
| 10417212 | Itgbl1   | NM_145467      | 3.37E-04 | -2.204 |
| 10546432 | Adamts9  | NM_175314      | 1.38E-02 | -2.195 |
| 10363415 | Spock2   | NM_052994      | 4.47E-04 | -2.19  |
| 10501903 | Synpo2   | BC158045       | 1.02E-02 | -2.188 |
| 10362201 | Ctgf     | NM_010217      | 1.50E-03 | -2.182 |
| 10344990 | Crispld1 | NM_031402      | 7.65E-04 | -2.177 |
| 10446473 | Lama1    | NM_008480      | 1.48E-02 | -2.166 |
| 10475643 | Fgf7     | NM_008008      | 8.75E-03 | -2.152 |
| 10405587 | Tgfbi    | NM_009369      | 4.73E-04 | -2.133 |
| 10526241 | Cldn3    | NM_009902      | 9.28E-03 | -2.128 |
| 10544756 | Hoxa3    | NM_010452      | 5.11E-03 | -2.128 |
| 10440534 | Adamts5  | NM_011782      | 9.42E-03 | -2.117 |
| 10607124 | Chrdl1   | NM_001114385   | 1.70E-03 | -2.109 |
| 10405047 | Aspn     | NM_025711      | 1.63E-02 | -2.093 |
| 10544774 | Hoxa6    | NM_010454      | 1.67E-02 | -2.088 |
| 10571142 | Gpr124   | NM_054044      | 2.12E-03 | -2.087 |
| 10387743 | Slc2a4   | NM_009204      | 3.58E-03 | -2.063 |
| 10466800 | Pgm5     | NM_175013      | 8.55E-04 | -2.05  |
| 10354588 | Stk17b   | NM_133810      | 8.04E-03 | -2.045 |
| 10532085 | Tgfbr3   | NM_011578      | 4.73E-04 | -2.036 |
| 10540034 | Aldh11l1 | NM_027406      | 1.85E-03 | -2.031 |
| 10365482 | Timp3    | NM_011595      | 5.76E-03 | -2.029 |
| 10569429 | Cdkn1c   | NM_009876      | 9.47E-04 | -2.026 |
| 10427436 | C7       | XM_356827      | 7.54E-03 | -2.024 |
| 10344981 | Pi15     | NM_053191      | 9.35E-04 | -2.014 |
| 10363157 | Pln      | NM_023129      | 3.07E-03 | 2.033  |
| 10517791 | Padi4    | NM_011061      | 6.83E-03 | 2.147  |
| 10599001 | Agtr2    | NM_007429      | 2.60E-03 | 2.183  |
| 10399854 | Slc26a4  | NM_011867      | 5.46E-04 | 2.685  |

DEG from PRKO vs PGR+/+ mouse uterus

| Probeset ID | Gene Symbol | RefSeq       | p-value   | Fold-Change (KO vs +/-) |
|-------------|-------------|--------------|-----------|-------------------------|
| 98320_at    | Cyp26a1     | NM_007811    | 0.0001768 | -9.64                   |
| 103377_at   | Lrp2        | NM_001081088 | 0.0004144 | -5.50                   |
| 94330_at    | Npl         | NM_028749    | 0.0003874 | -5.28                   |
| 100539_at   | Acot7       | NM_133348    | 0.0001134 | -4.88                   |
| 93328_at    | Hdc         | NM_008230    | 0.0002028 | -4.83                   |
| 100046_at   | Mthfd2      | NM_008638    | 0.0006155 | -4.40                   |
| 102955_at   | Nfil3       | NM_017373    | 0.0034485 | -3.49                   |
| 102430_at   | Myd88       | NM_010851    | 0.000993  | -3.13                   |
| 161034_at   | Pla2g10     | NM_011987    | 0.0003349 | -2.92                   |
| 94995_at    | Ggct        | NM_026637    | 9.91E-05  | -2.83                   |
| 92810_at    | Pdk3        | NM_145630    | 0.0043919 | -2.76                   |
| 97890_at    | Sgk1        | NM_011361    | 4.33E-05  | -2.73                   |
| 92208_at    | Caprin2     | NM_181541    | 6.94E-05  | -2.53                   |
| 96935_at    | Pdzk1ip1    | NM_026018    | 0.0003745 | -2.52                   |
| 95597_at    | Ptgs1       | NM_008969    | 0.0023747 | -2.49                   |
| 103490_at   | Wnt11       | NM_009519    | 0.0052014 | -2.43                   |
| 92796_at    | Alpl        | NM_007431    | 0.0098392 | -2.43                   |
| 98792_at    | Slc25a48    | NM_177809    | 5.31E-05  | -2.37                   |
| 101973_at   | Cited2      | NM_010828    | 0.0027567 | -2.31                   |
| 93270_at    | Gars        | NM_180678    | 0.0070477 | -2.28                   |
| 101913_at   | Clcn5       | NM_016691    | 0.005943  | -2.25                   |
| 160127_at   | Ccng1       | NM_009831    | 0.0001139 | -2.24                   |
| 104174_at   | Enpp1       | NM_008813    | 0.0026194 | -2.24                   |
| 160236_at   | Slain1      | NM_198014    | 0.0084292 | -2.22                   |
| 96912_s_at  | Ctla2a      | NM_007796    | 0.0020732 | -2.17                   |
| 160393_at   | Etnk1       | NM_029250    | 0.0036843 | -2.05                   |
| 101561_at   | Mt2         | NM_008630    | 0.0075874 | -2.04                   |
| 103514_at   | Tnfrsf21    | NM_178589    | 0.0006605 | -2.02                   |
| 160921_at   | Acss1       | NM_080575    | 0.0040511 | -2.01                   |
| 103451_at   | Ptk2b       | NM_172498    | 0.002168  | -2.01                   |
| 93985_at    | Tiparp      | NM_178892    | 0.0033437 | -2.00                   |
| 160565_at   | Ckmt1       | NM_009897    | 0.0092232 | -2.00                   |
| 103573_at   | Pip5k1b     | NM_008846    | 0.0026046 | -2.00                   |
| 93515_at    | Cdh16       | NM_007663    | 0.0089504 | 2.02                    |
| 92487_at    | Sox7        | NM_011446    | 0.0004988 | 2.04                    |
| 101560_at   | Emb         | NM_010330    | 0.0008491 | 2.07                    |
| 103048_at   | Mycn        | NM_008709    | 0.0066011 | 2.10                    |
| 102773_at   | Car8        | NM_007592    | 0.0075001 | 2.12                    |
| 160857_at   | Efnb2       | NM_010111    | 0.0005066 | 2.18                    |
| 92403_at    | St6galnac5  | NM_012028    | 0.0028221 | 2.26                    |
| 98423_at    | Gjb2        | NM_008125    | 0.0038506 | 2.89                    |





**Supplementary data 10: GO analysis of DEG in the uterus, oviduct and granulosa cells.**

DEG were selected from independent microarrays performed on PRKO vs PGR+/ $\pm$  uterus, oviduct and granulosa cells and subjected to GO analysis using the *limma* Bioconductor package in R with mm10 terminology and a FDR = 0.05 cut-off. For each tissue, the five most significantly enriched GO terms from each GO category were selected as representation.

|                    |           | GO ID      | Term                                               | Total gene in pathway | Gene in DEG | p-value     |
|--------------------|-----------|------------|----------------------------------------------------|-----------------------|-------------|-------------|
| Biological Process | Uterus    | GO:0008219 | Cell death                                         | 1910                  | 91          | 5.59927E-17 |
|                    |           | GO:0044763 | Single-organism cellular process                   | 9986                  | 269         | 1.64785E-15 |
|                    |           | GO:0044699 | Single-organism process                            | 13406                 | 330         | 2.84373E-15 |
|                    |           | GO:0044237 | Cellular metabolic process                         | 9150                  | 251         | 6.83939E-15 |
|                    |           | GO:0051179 | Localisation                                       | 5612                  | 174         | 1.13035E-13 |
|                    | Granulosa | GO:0044699 | Single-organism process                            | 13406                 | 47          | 7.13258E-07 |
|                    |           | GO:2000026 | Regulation of multicellular organismal development | 1869                  | 16          | 1.94244E-06 |
|                    |           | GO:0050793 | Regulation of developmental process                | 2406                  | 18          | 2.53583E-06 |
|                    |           | GO:0009653 | Anatomical structure morphogenesis                 | 2480                  | 18          | 3.90994E-06 |
|                    |           | GO:0044763 | Single-organism cellular process                   | 9986                  | 39          | 4.24759E-06 |
|                    | Oviduct   | GO:0009888 | Tissue development                                 | 1780                  | 24          | 3.73383E-10 |
|                    |           | GO:0048513 | Animal organ development                           | 3233                  | 31          | 2.04069E-09 |
|                    |           | GO:0044767 | Single-organism developmental process              | 5844                  | 42          | 3.59358E-09 |
|                    |           | GO:0032502 | Developmental process                              | 5900                  | 42          | 4.87343E-09 |
|                    |           | GO:0072359 | Circulatory system development                     | 1015                  | 17          | 1.04433E-08 |
| Molecular Function | Uterus    | GO:0005488 | Binding                                            | 12634                 | 331         | 1.08059E-20 |
|                    |           | GO:0005515 | Protein binding                                    | 8341                  | 245         | 2.39469E-18 |
|                    |           | GO:0042802 | Identical protein binding                          | 1477                  | 64          | 2.61609E-10 |
|                    |           | GO:0003824 | Catalytic activity                                 | 5604                  | 159         | 3.05612E-09 |
|                    |           | GO:0097159 | Organic cyclic compound binding                    | 5284                  | 150         | 1.11796E-08 |
|                    | Granulosa | GO:0005515 | Protein binding                                    | 8341                  | 39          | 1.79629E-08 |
|                    |           | GO:0005488 | Binding                                            | 12634                 | 46          | 3.83712E-07 |
|                    |           | GO:0043262 | Adenosine-diphosphatase activity                   | 5                     | 2           | 4.89076E-05 |
|                    |           | GO:0042802 | Identical protein binding                          | 1477                  | 12          | 8.17863E-05 |
|                    |           | GO:0051015 | Actin filament binding                             | 146                   | 4           | 0.000321108 |
|                    | Oviduct   | GO:0005488 | Binding                                            | 12634                 | 62          | 3.76218E-08 |
|                    |           | GO:0005539 | Glycosaminoglycan binding                          | 181                   | 8           | 9.40685E-08 |
|                    |           | GO:0043167 | Ion binding                                        | 5243                  | 35          | 1.3889E-06  |
|                    |           | GO:0005515 | Protein binding                                    | 8341                  | 46          | 1.94658E-06 |
|                    |           | GO:0097367 | Carbohydrate derivative binding                    | 2083                  | 20          | 3.70917E-06 |
| Cellular Component | Uterus    | GO:0044464 | Cell part                                          | 15305                 | 377         | 5.25646E-22 |
|                    |           | GO:0005623 | Cell                                               | 15313                 | 377         | 6.00872E-22 |
|                    |           | GO:0005737 | Cytoplasm                                          | 10208                 | 281         | 3.13185E-18 |
|                    |           | GO:0043227 | Membrane-bounded organelle                         | 11436                 | 302         | 1.2542E-17  |
|                    |           | GO:0044424 | Intracellular part                                 | 13050                 | 330         | 1.73052E-17 |
|                    | Granulosa | GO:0044464 | Cell part                                          | 15305                 | 52          | 1.02037E-08 |
|                    |           | GO:0005623 | Cell                                               | 15313                 | 52          | 1.04673E-08 |
|                    |           | GO:0005886 | Plasma membrane                                    | 4724                  | 29          | 2.48526E-08 |
|                    |           | GO:0071944 | Cell periphery                                     | 4841                  | 29          | 4.38558E-08 |
|                    |           | GO:0005622 | Intracellular                                      | 13157                 | 45          | 7.75588E-06 |
|                    | Oviduct   | GO:0005578 | Proteinaceous extracellular matrix                 | 345                   | 14          | 2.91366E-12 |
|                    |           | GO:0031012 | Extracellular matrix                               | 500                   | 15          | 3.28289E-11 |
|                    |           | GO:0005576 | Extracellular region                               | 4488                  | 37          | 1.54077E-09 |
|                    |           | GO:0044421 | Extracellular region part                          | 3956                  | 34          | 3.87552E-09 |
|                    |           | GO:0071944 | Cell periphery                                     | 4841                  | 32          | 6.84718E-06 |

**Supplementary data 11: Canonical pathway analysis of DEG in the uterus, oviduct and granulosa cells.** DEG were selected from independent microarrays performed on PRKO vs PGR+/ $\pm$  uterus, oviduct and granulosa cells and subjected to analysis using IPA software with core analysis on default setting. Pathways were selected for those with  $-\log(\text{p-value}) \geq 2$  in at least one tissue.  $-\log(\text{p-value})$  is shown for each tissue type – uterus (dark blue), oviduct (azure), granulosa cells (sky blue). When a pathway is not identified in the tissue, the  $-\log(\text{p-value})$  bar is missing.

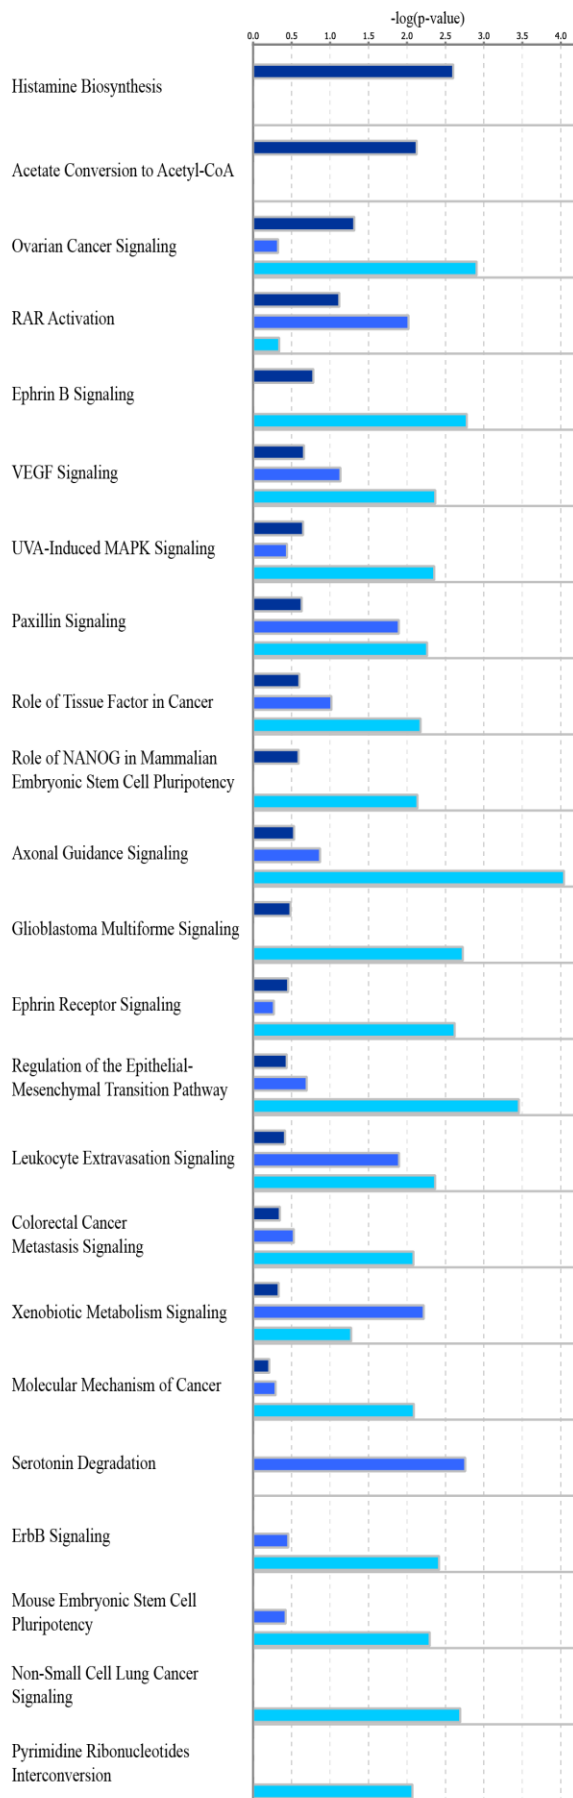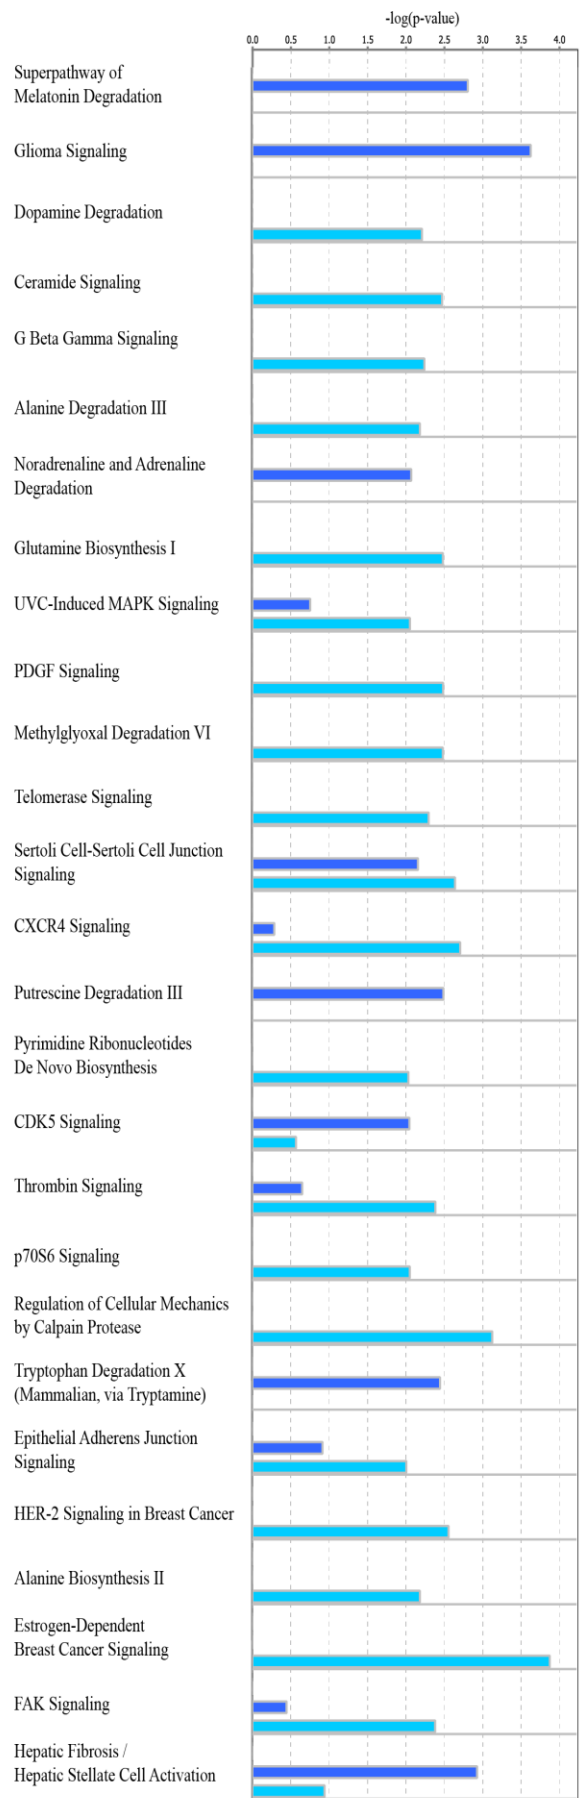

■ Uterus      ■ Oviduct      ■ Granulosa cell
